# Supplementary material for: Two-year visual and psychological outcomes of ranibizumab and subsequent treatment for diabetic macular oedema in Japan (MERCURY)
Source: HighWire-hosted journal article supplement (doi:10.1136/bmjophth-2022-001069), 2022-10-01
Supplement: bmjophth-2022-001069supp001_data_supplement.pdf [file bmjophth-2022-001069supp001_data_supplement.pdf]

**Supplementary material****Supplementary Table S1.** List of Independent Ethics Committees or Institutional Review

Boards by study centre

| <b>IEC/IRB</b>                                                                       | <b>Centre</b>                                             | <b>City</b> | <b>Province</b> |
|--------------------------------------------------------------------------------------|-----------------------------------------------------------|-------------|-----------------|
| Tokyo Medical University Hachioji<br>Medical Center Institutional Review<br>Board    | Tokyo Medical<br>University Hachioji<br>Medical Center    | Hachioji    | Tokyo           |
| Hyogo Prefectural Amagasaki<br>General Medical Center Institutional<br>Review Board  | Hyogo Prefectural<br>Amagasaki General<br>Medical Center  | Amagasaki   | Hyogo           |
| Mie University Hospital Institutional<br>Review Board                                | Mie University Hospital                                   | Tsu         | Mie             |
| Kagoshima University Hospital<br>Institutional Review Board                          | Kagoshima University<br>Hospital                          | Kagoshima   | Kagoshima       |
| St. Marianna University School of<br>Medicine Hospital Institutional<br>Review Board | St. Marianna University<br>School of Medicine<br>Hospital | Kawasaki    | Kanagawa        |
| Tokushima University Hospital<br>Institutional Review Board                          | Tokushima University<br>Hospital                          | Tokushima   | Tokushima       |
| The Ethical Committee of Sapporo<br>City General Hospital                            | Sapporo City General<br>Hospital                          | Sapporo     | Hokkaido        |
| Kobe University Hospital<br>Institutional Review Board                               | Kobe University<br>Hospital                               | Kobe        | Hyogo           |
| Nara Medical University Hospital<br>Institutional Review Board                       | Nara Medical University<br>Hospital                       | Kashihara   | Nara            |

|                                                                            |                                                    |            |          |
|----------------------------------------------------------------------------|----------------------------------------------------|------------|----------|
| Tokyo Women's Medical University<br>Hospital Institutional Review Board    | Tokyo Women's<br>Medical University<br>Hospital    | Shinjuku   | Tokyo    |
| University of Fukui Hospital<br>Institutional Review Board                 | University of Fukui<br>Hospital                    | Yoshida    | Fukui    |
| Kyoto University Hospital<br>Institutional Review Board                    | Kyoto University<br>Hospital                       | Kyoto      | Kyoto    |
| National Defense Medical College<br>Hospital Institutional Review Board    | National Defense<br>Medical College<br>Hospital    | Tokorozawa | Saitama  |
| Shinshu University Hospital<br>Institutional Review Board                  | Shinshu University<br>Hospital                     | Matsumoto  | Nagano   |
| Kyushu University Hospital<br>Institutional Review Board                   | Kyushu University<br>Hospital                      | Fukuoka    | Fukuoka  |
| Kyorin University Hospital<br>Institutional Review Board                   | Kyorin University<br>Hospital                      | Mitaka     | Tokyo    |
| University of Tsukuba Hospital<br>Institutional Review Board               | University of Tsukuba<br>Hospital                  | Tsukuba    | Ibaraki  |
| Yamagata University Hospital<br>Institutional Review Board                 | Yamagata University<br>Hospital                    | Yamagata   | Yamagata |
| Shiga University of Medical Science<br>Hospital Institutional Review Board | Shiga University of<br>Medical Science<br>Hospital | Otsu       | Shiga    |
| Nagoya City University Hospital<br>Institutional Review Board              | Nagoya City University<br>Hospital                 | Nagoya     | Aichi    |

---

IEC, independent ethics committee; IRB, institutional review board.
